# Supplementary material for: High-throughput metabolomic approach revealed the acupuncture exerting intervention effects by perturbed signatures and pathways
Source: Royal Society of Chemistry journal article supplement (doi:10.1039/c3mb70352e), 2013-10-01
Supplement: c3mb70352e.pdf [file c3mb70352e.pdf]

**Supplementary table 1.** Result from ingenuity pathway analysis

| No. | Pathway Name                                        | Total | Expected | Hits | Raw p    | Impact  |
|-----|-----------------------------------------------------|-------|----------|------|----------|---------|
| 1   | D-Glutamine and D-glutamate metabolism              | 11    | 0.01828  | 1    | 0.018166 | 0.02674 |
| 2   | Alanine, aspartate and glutamate metabolism         | 24    | 0.039884 | 1    | 0.039315 | 0.20703 |
| 3   | Phenylalanine, tyrosine and tryptophan biosynthesis | 27    | 0.044869 | 1    | 0.044147 | 0       |
| 4   | Nitrogen metabolism                                 | 39    | 0.064811 | 1    | 0.063291 | 0       |
| 5   | Phenylalanine metabolism                            | 45    | 0.074782 | 1    | 0.072755 | 0.04875 |
| 6   | Pyrimidine metabolism                               | 60    | 0.099709 | 1    | 0.0961   | 0       |
| 7   | Arachidonic acid metabolism                         | 62    | 0.10303  | 1    | 0.099179 | 0       |
| 8   | Aminoacyl-tRNA biosynthesis                         | 75    | 0.12464  | 1    | 0.119    | 0       |
| 9   | Arginine and proline metabolism                     | 77    | 0.12796  | 1    | 0.12202  | 0       |
| 10  | Purine metabolism                                   | 92    | 0.15289  | 1    | 0.14443  | 0       |
| 11  | Steroid hormone biosynthesis                        | 99    | 0.16452  | 1    | 0.15474  | 0.00479 |

Note: Total is the total number of compounds in the pathway; the Hits is the actually matched number from the user uploaded data; the Raw p is the original p value calculated from the enrichment analysis; the Impact is the pathway impact value calculated from pathway topology analysis.
